# Supplementary material for: The Synthesis and Preclinical Investigation of Lactosamine-Based Radiopharmaceuticals for the Detection of Galectin-3-Expressing Melanoma Cells
Source: MDPI journal article supplement (doi:10.3390/pharmaceutics14112504), 2022-11-18
Supplement: s1 [file s1]

# Synthesis and preclinical investigation of lactosamine-based radiopharmaceuticals for the detection of galectin-3-expressing melanoma cells

Barbara Gyuricza, Ágnes Szűcs, Judit P. Szabó, Viktória Arató, Zita Képes, Dániel Szűcs, Dezső Szikra, György Trencsényi, Anikó Fekete

Part 1:  $^1\text{H}$  NMR and  $^{13}\text{C}$  NMR spectra of compound 2, 3 and 4.

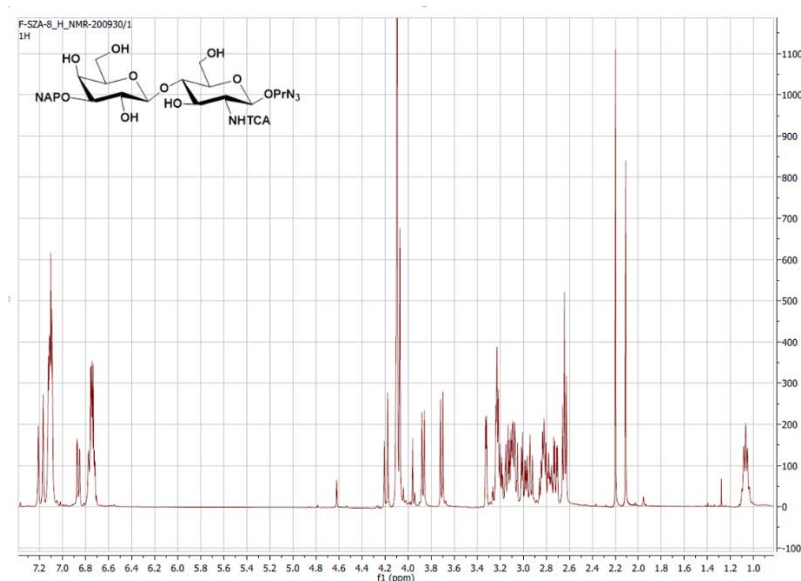

Figure S1  $^1\text{H}$  NMR spectrum of compound 2

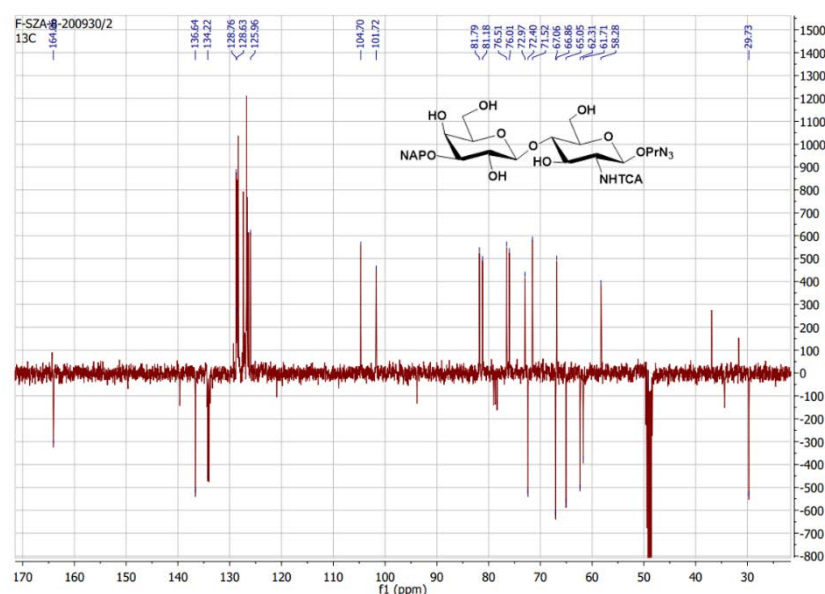

Figure S2  $^{13}\text{C}$  NMR spectrum of compound 2

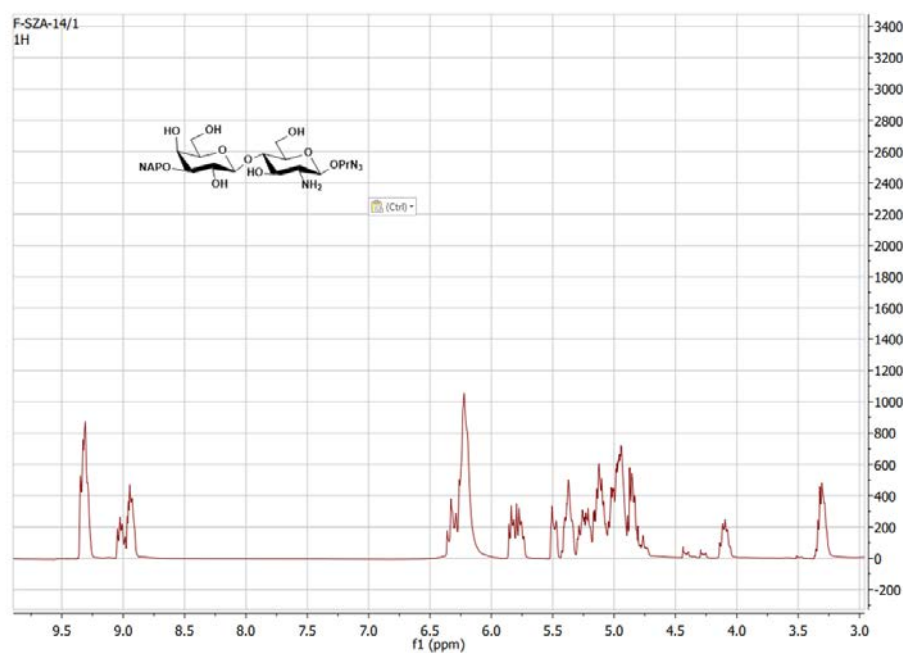

Figure S3 <sup>1</sup>H NMR spectrum of compound 3

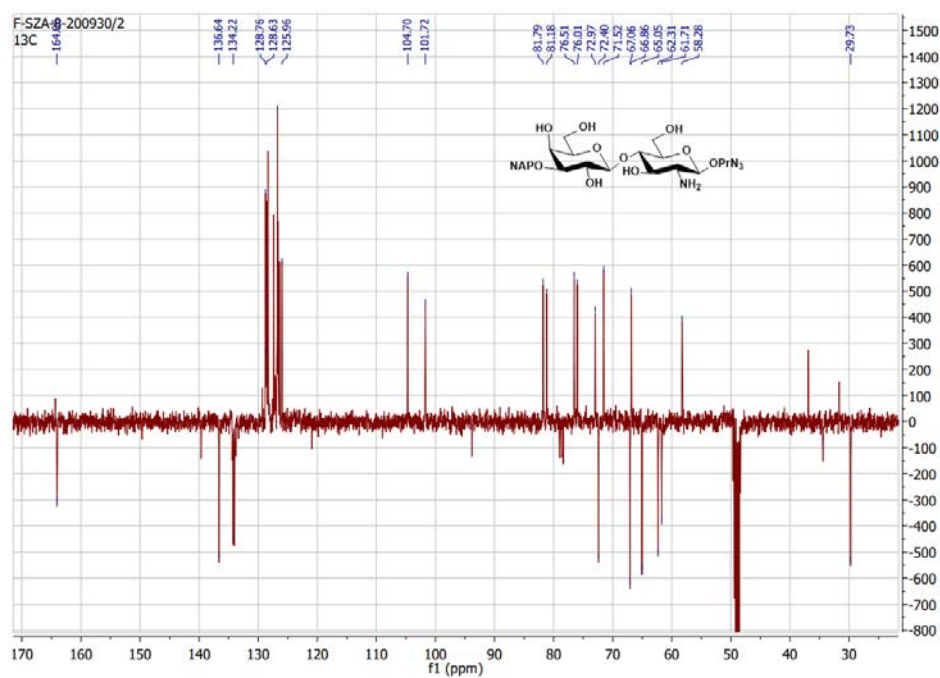

Figure S4 <sup>13</sup>C NMR spectrum of compound 3

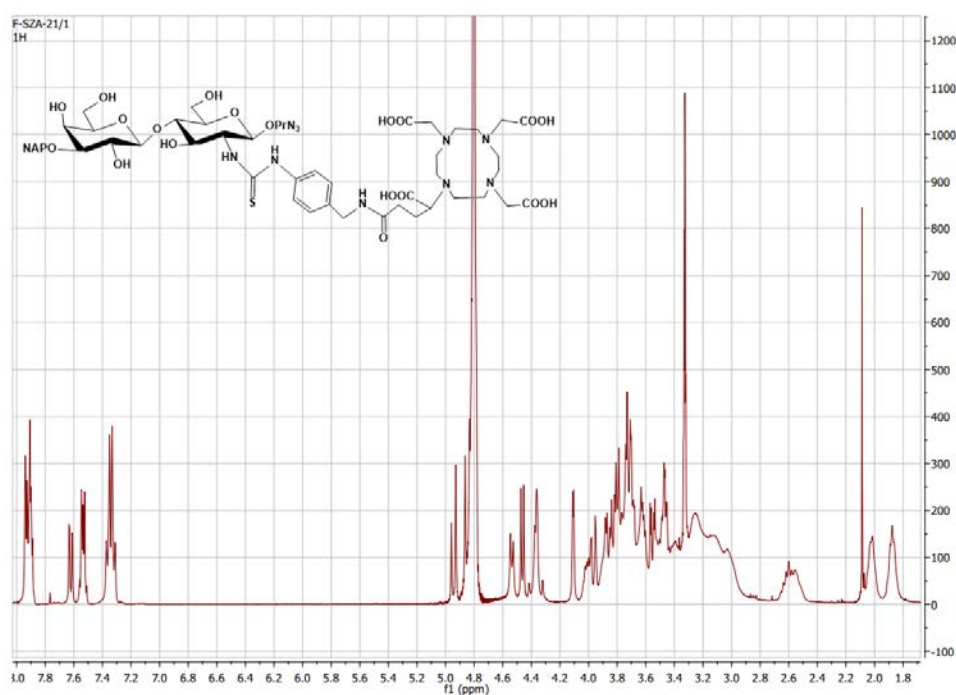Figure S5  $^1\text{H}$  NMR spectrum of compound 4

## Part 2: Mass spectra of compound 2, 3, 4, 7, 8 and 9

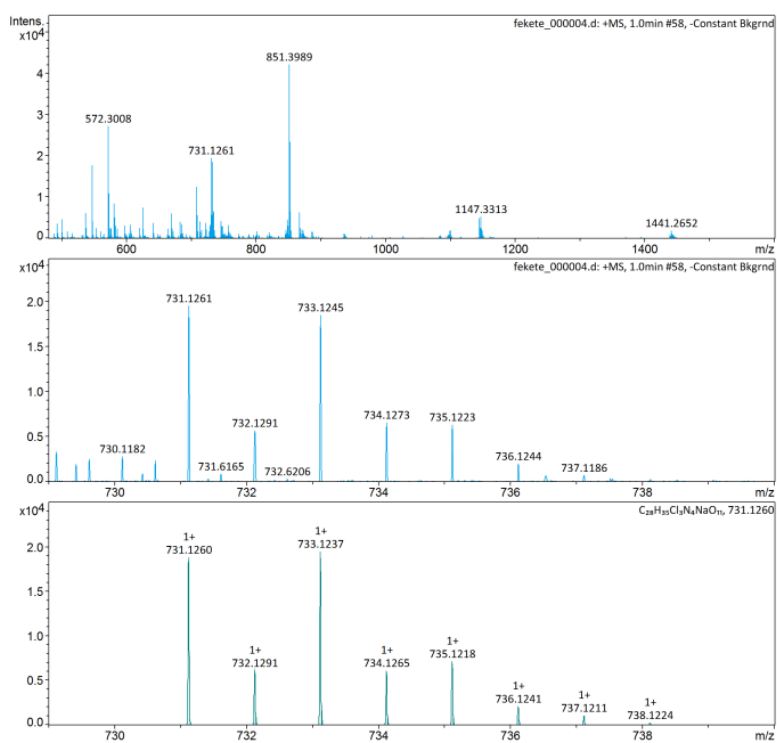

Figure S6 Mass spectrum of compound 2

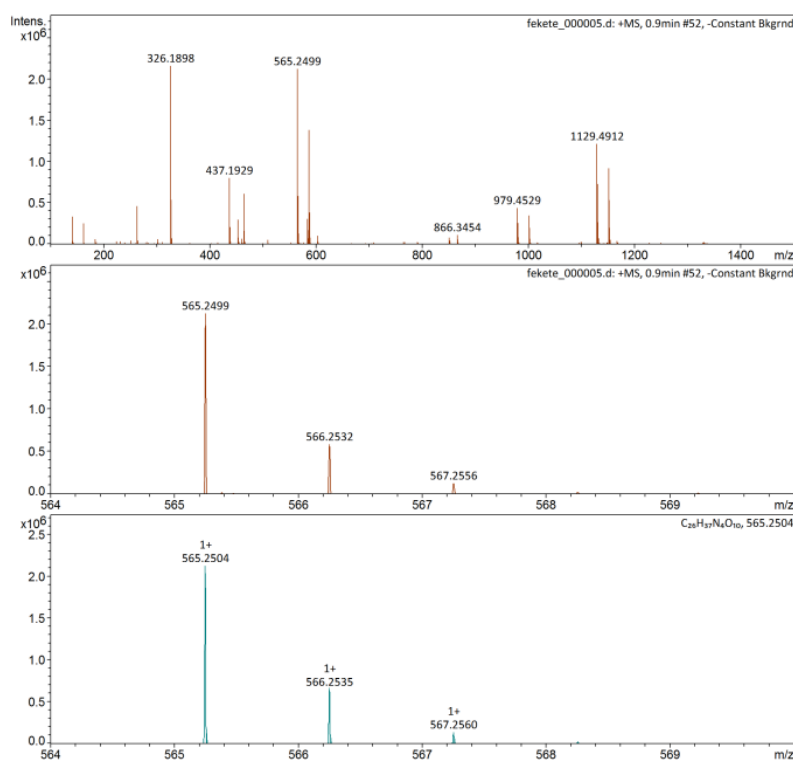

Figure S7 Mass spectrum of compound 3

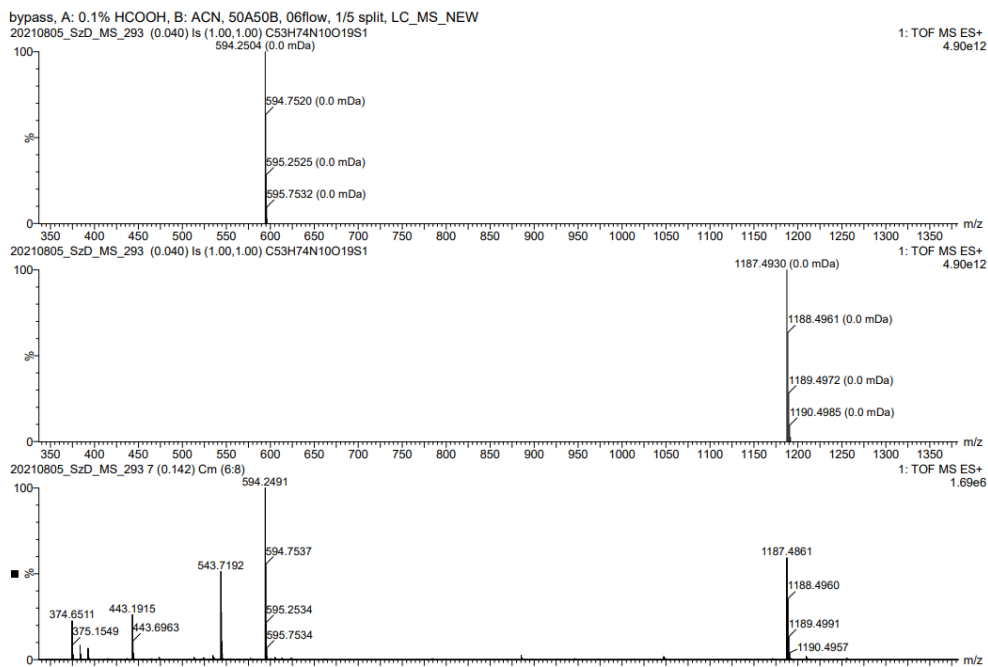

Figure S8 Mass spectrum of compound 4

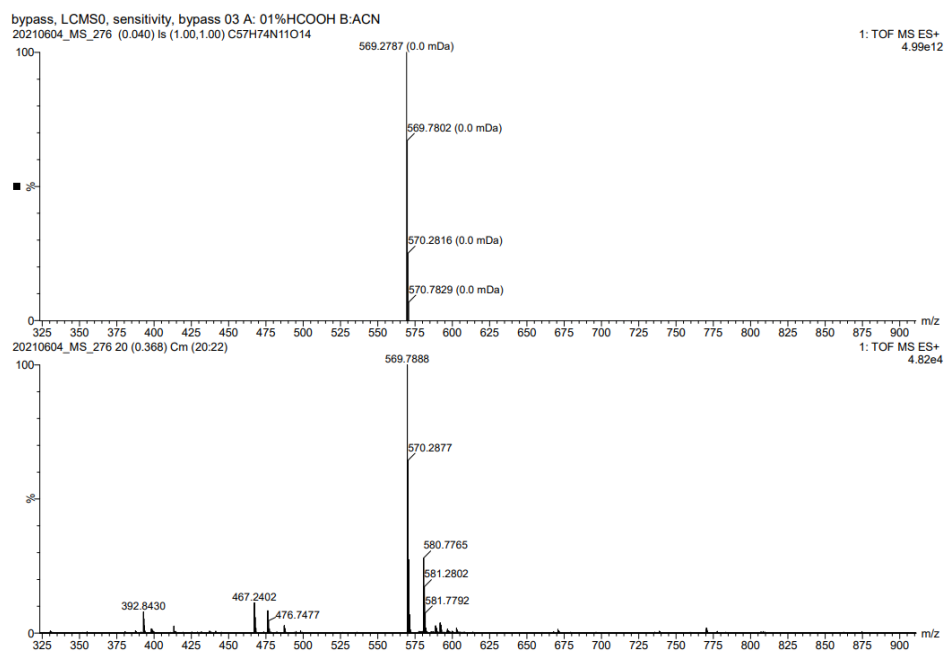

Figure S9 Mass spectrum of compound 7

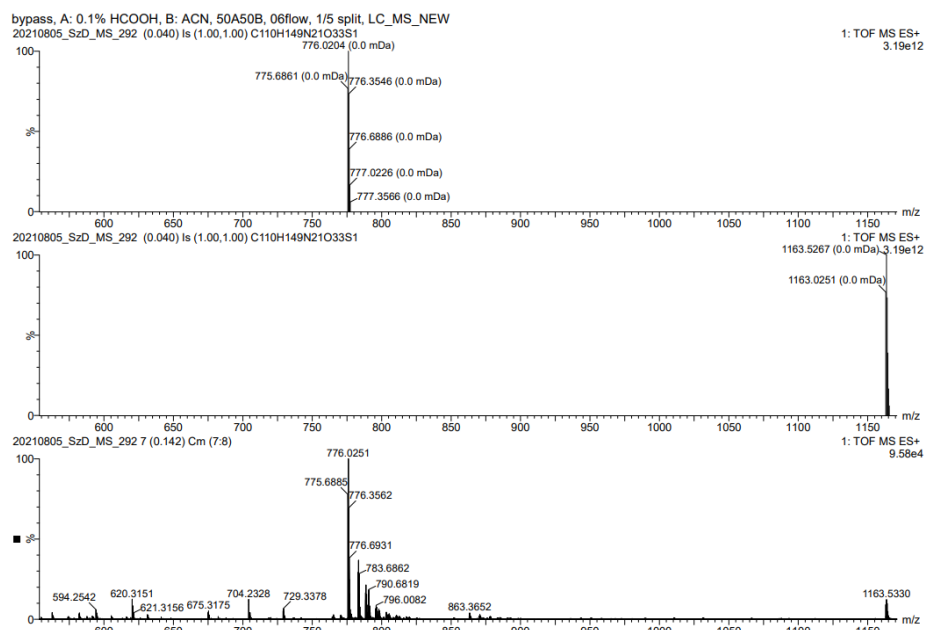

Figure S10 Mass spectrum of compound 8

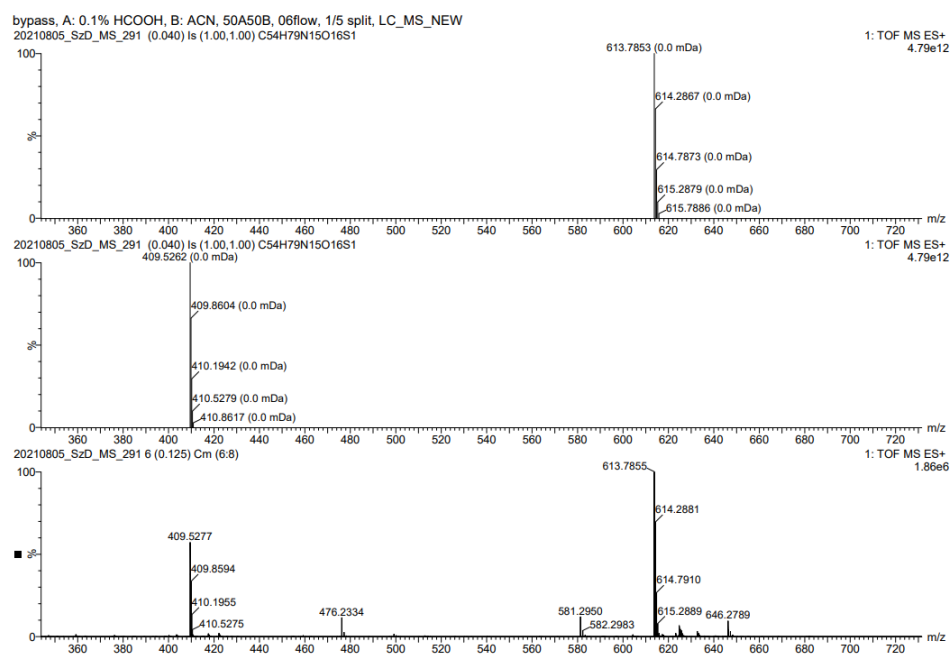

Figure S11 Mass spectrum of compound 9

### Part 3: Stability studies of [ $^{68}\text{Ga}$ ]Ga-DOTAGA-LacN(NAP) and [ $^{68}\text{Ga}$ ]Ga-DOTAGA-LacN(NAP)-cRGDfK

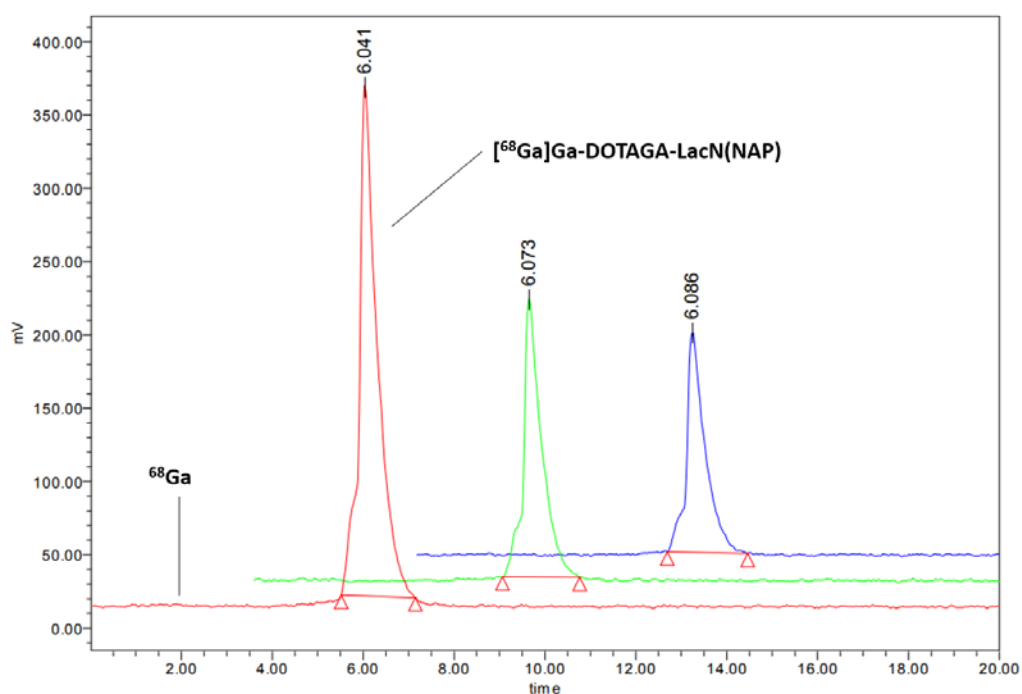Figure S12 Stability test of [ $^{68}\text{Ga}$ ]Ga-DOTAGA-LacN(NAP) in 0.01 M  $\text{Na}_2\text{EDTA}$  solution.

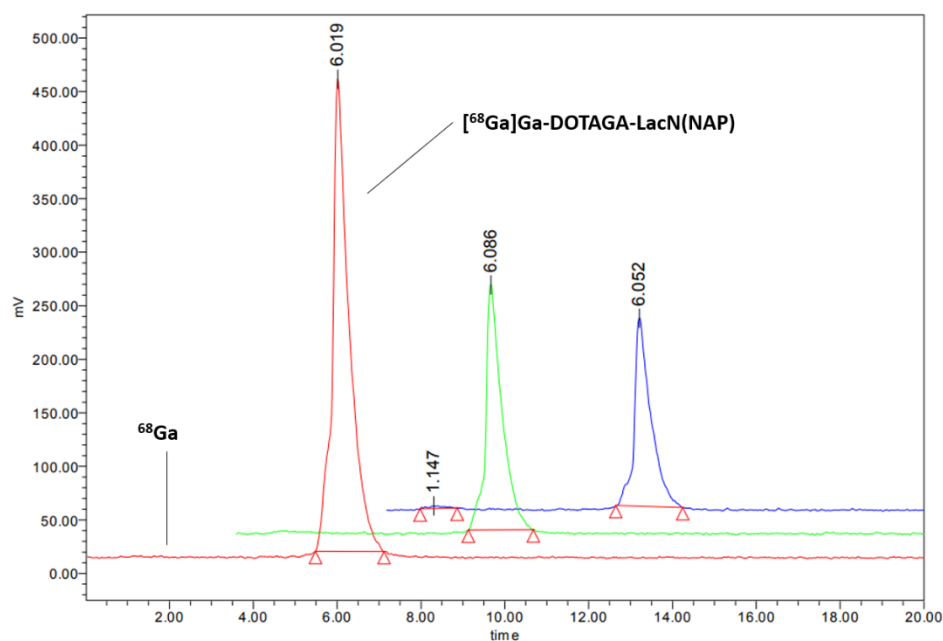

**Figure S13** Stability test of  $[^{68}\text{Ga}]\text{Ga-DOTAGA-LacN(NAP)}$  in 0.01 M oxalic acid solution.

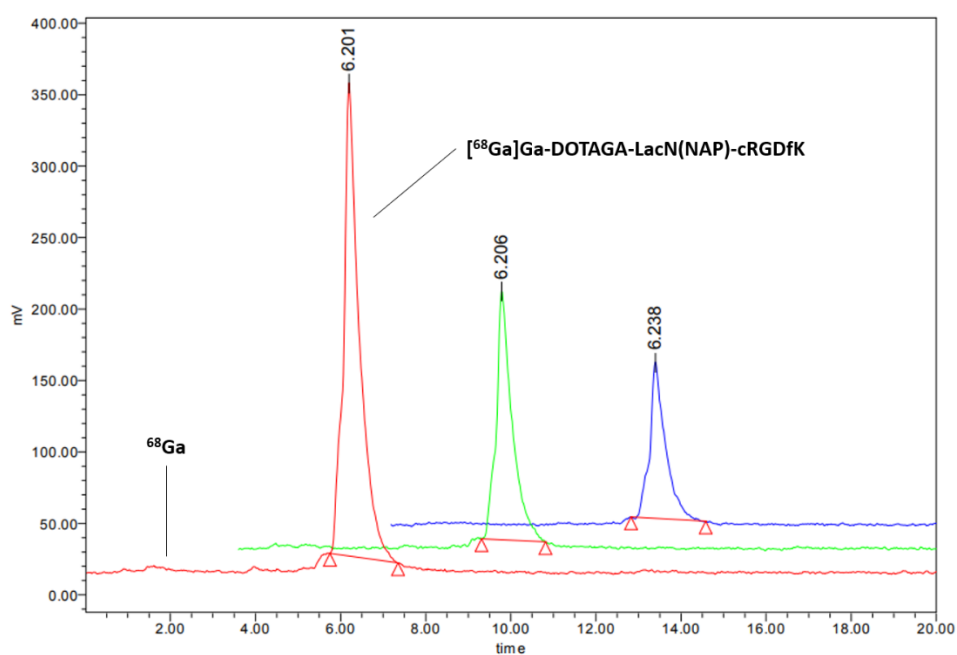

**Figure S14** Stability test of  $[^{68}\text{Ga}]\text{Ga-DOTAGA-LacN(NAP)-cRGDfK}$  in 0.01 M  $\text{Na}_2\text{EDTA}$  solution.

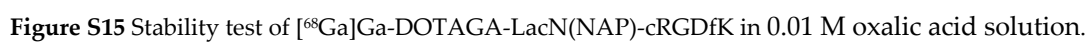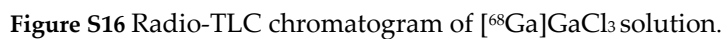



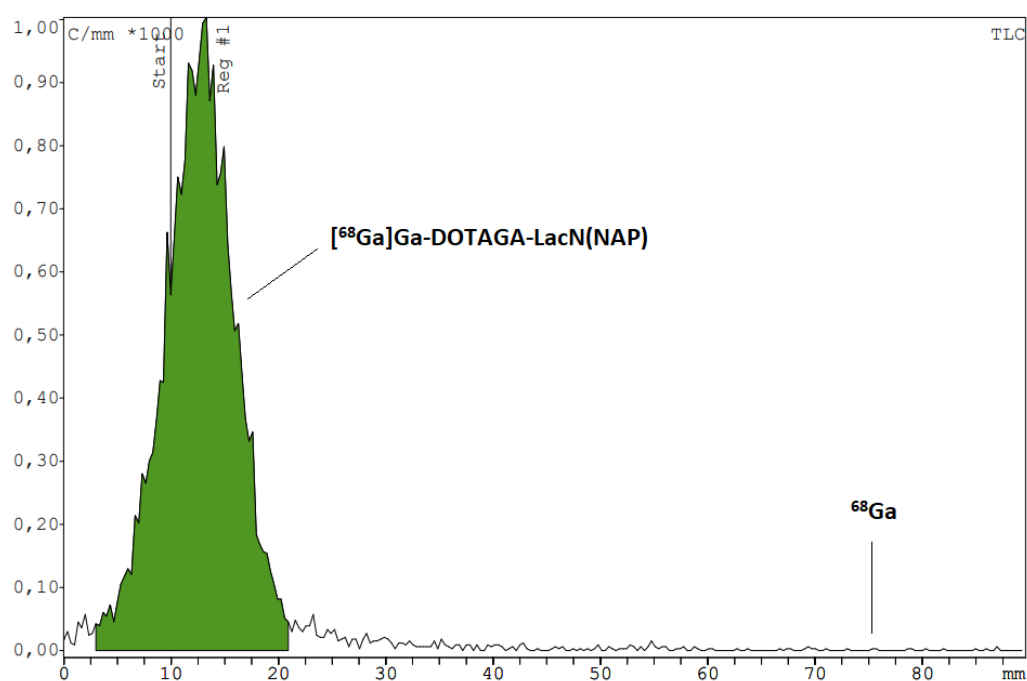

Figure S17 Stability test of  $[^{68}\text{Ga}]\text{Ga-DOTAGA-LacN(NAP)}$  in human serum after 2 hours.

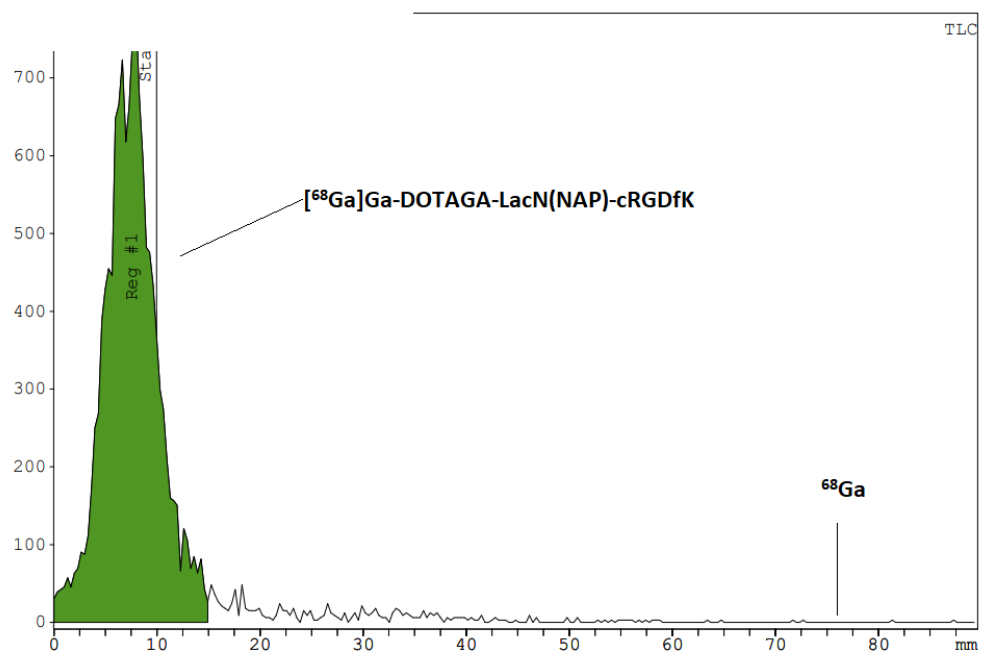

Figure S18 Stability test of  $[^{68}\text{Ga}]\text{Ga-DOTAGA-LacN(NAP)-cRGDfK}$  in human serum after 2 hours.

**TableS1** *Ex vivo* biodistribution of  $^{68}\text{Ga}$ -labeled DOTAGA-LacN(NAP), DOTAGA-LacN(NAP)-cRGDfK, and DOTAGA-cRGDfK in B16-F10 tumor-bearing mice (n=5/radiopharmaceutical) 100 min after intravenous injection of the radiotracers. %ID/g tissue values are presented as mean $\pm$ SD.

|                 | $^{68}\text{Ga}$ ]Ga-DOTAGA-LacN(NAP) | $^{68}\text{Ga}$ ]Ga-DOTAGA-LacN(NAP)-cRGDfK | $^{68}\text{Ga}$ ]Ga-DOTAGA-cRGDfK |
|-----------------|---------------------------------------|----------------------------------------------|------------------------------------|
| blood           | 0.29 $\pm$ 0.01                       | 0.58 $\pm$ 0.14                              | 0.37 $\pm$ 0.05                    |
| liver           | 0.33 $\pm$ 0.19                       | 2.19 $\pm$ 0.73                              | 1.00 $\pm$ 0.25                    |
| spleen          | 0.17 $\pm$ 0.02                       | 1.60 $\pm$ 1.17                              | 0.80 $\pm$ 0.09                    |
| kidney          | 8.19 $\pm$ 1.36                       | 6.14 $\pm$ 1.14                              | 2.43 $\pm$ 0.26                    |
| small intestine | 0.27 $\pm$ 0.9                        | 1.77 $\pm$ 0.96                              | 0.78 $\pm$ 0.20                    |
| large intestine | 0.13 $\pm$ 0.01                       | 1.74 $\pm$ 0.70                              | 0.55 $\pm$ 0.16                    |
| stomach         | 0.14 $\pm$ 0.04                       | 1.70 $\pm$ 0.72                              | 0.69 $\pm$ 0.21                    |
| muscle          | 0.05 $\pm$ 0.01                       | 0.27 $\pm$ 0.07                              | 0.10 $\pm$ 0.01                    |
| fat             | 0.11 $\pm$ 0.08                       | 0.17 $\pm$ 0.13                              | 0.19 $\pm$ 0.08                    |
| lungs           | 0.35 $\pm$ 0.06                       | 1.54 $\pm$ 0.62                              | 0.66 $\pm$ 0.18                    |
| heart           | 0.12 $\pm$ 0.02                       | 0.61 $\pm$ 0.17                              | 0.26 $\pm$ 0.06                    |
| brain           | 0.02 $\pm$ 0.01                       | 0.06 $\pm$ 0.01                              | 0.03 $\pm$ 0.01                    |
| bone (femur)    | 0.07 $\pm$ 0.02                       | 0.54 $\pm$ 0.21                              | 0.26 $\pm$ 0.04                    |
| salivary glands | 0.11 $\pm$ 0.02                       | 1.34 $\pm$ 0.50                              | 0.54 $\pm$ 0.18                    |
| gall bladder    | 0.43 $\pm$ 0.38                       | 3.07 $\pm$ 2.10                              | 0.84 $\pm$ 0.29                    |
| pancreas        | 0.11 $\pm$ 0.06                       | 0.43 $\pm$ 0.12                              | 0.18 $\pm$ 0.06                    |
